# Supplementary material
Source: PubMed Central journal article supplement (PMC7429343)

**A****Overall survival (OS) and progression-free survival (PFS) for all patients**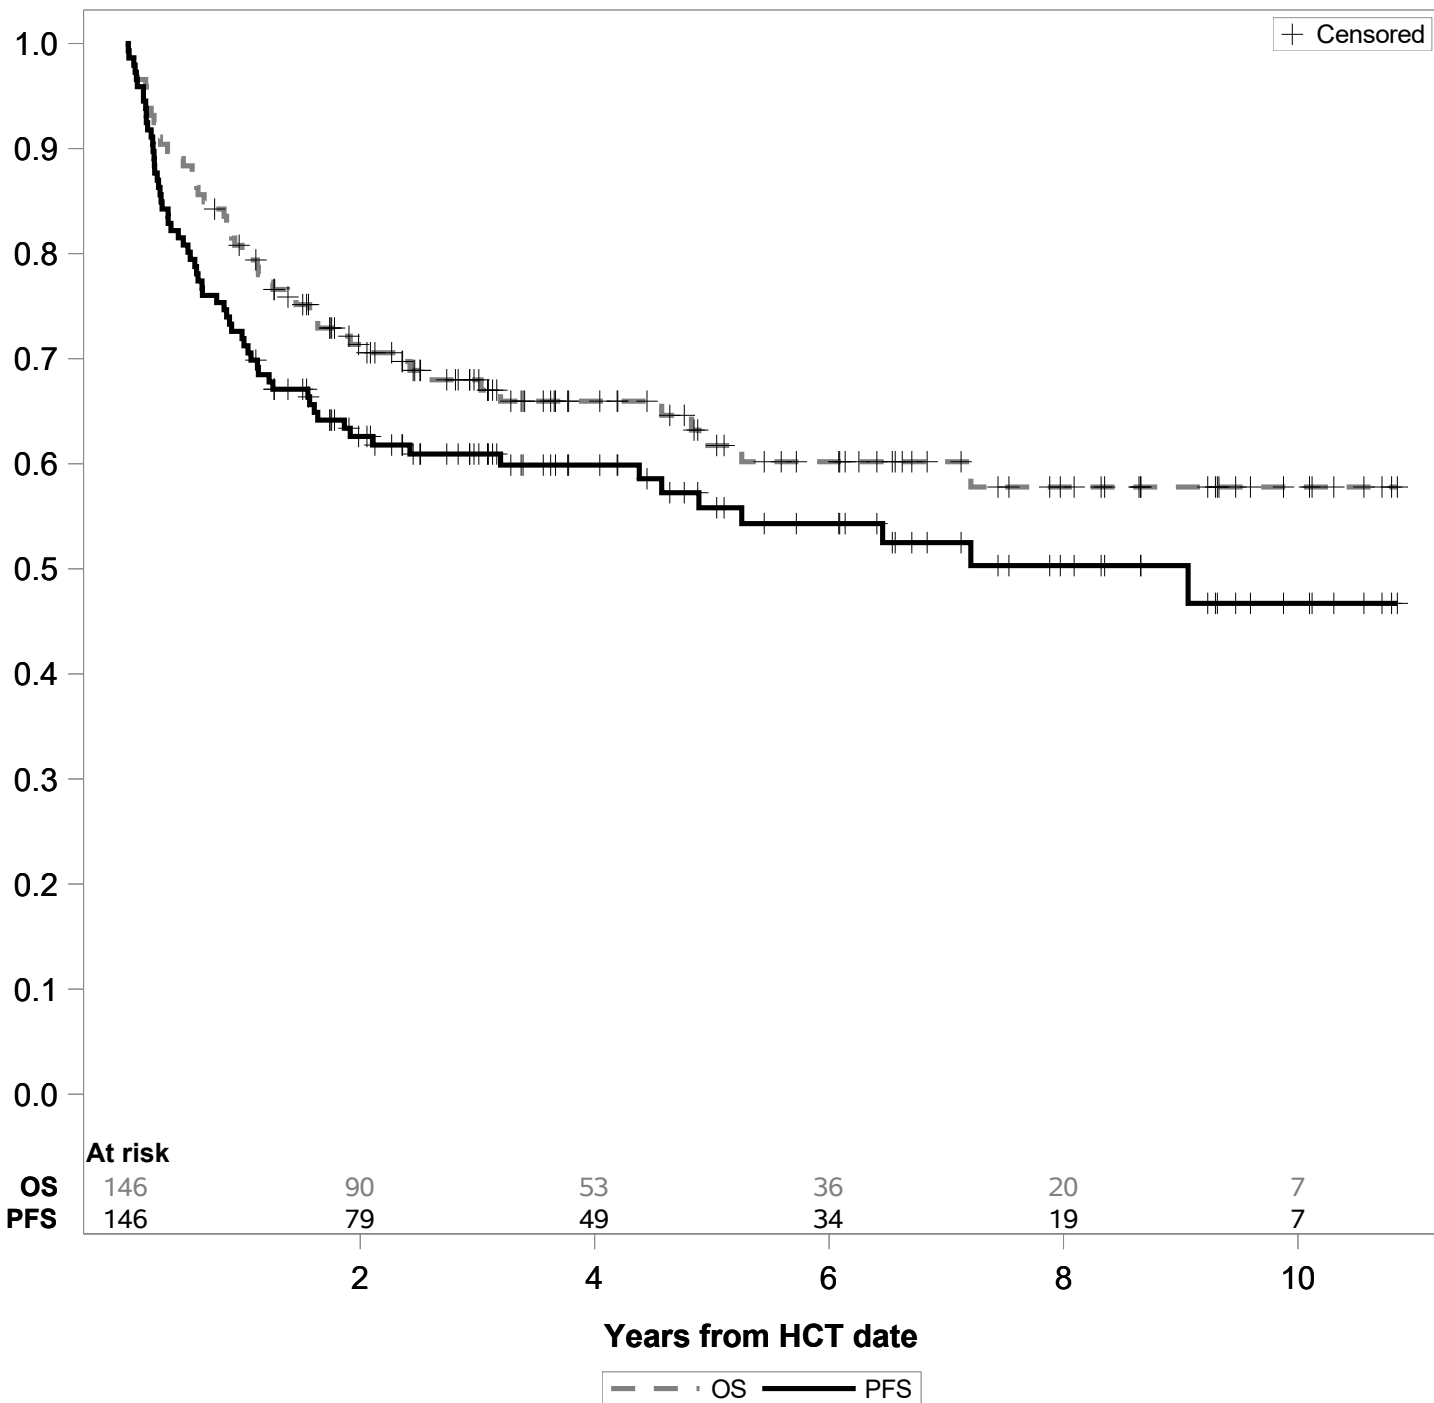

**B****Non-relapse mortality (NRM) and relapse/progression of disease for all patients**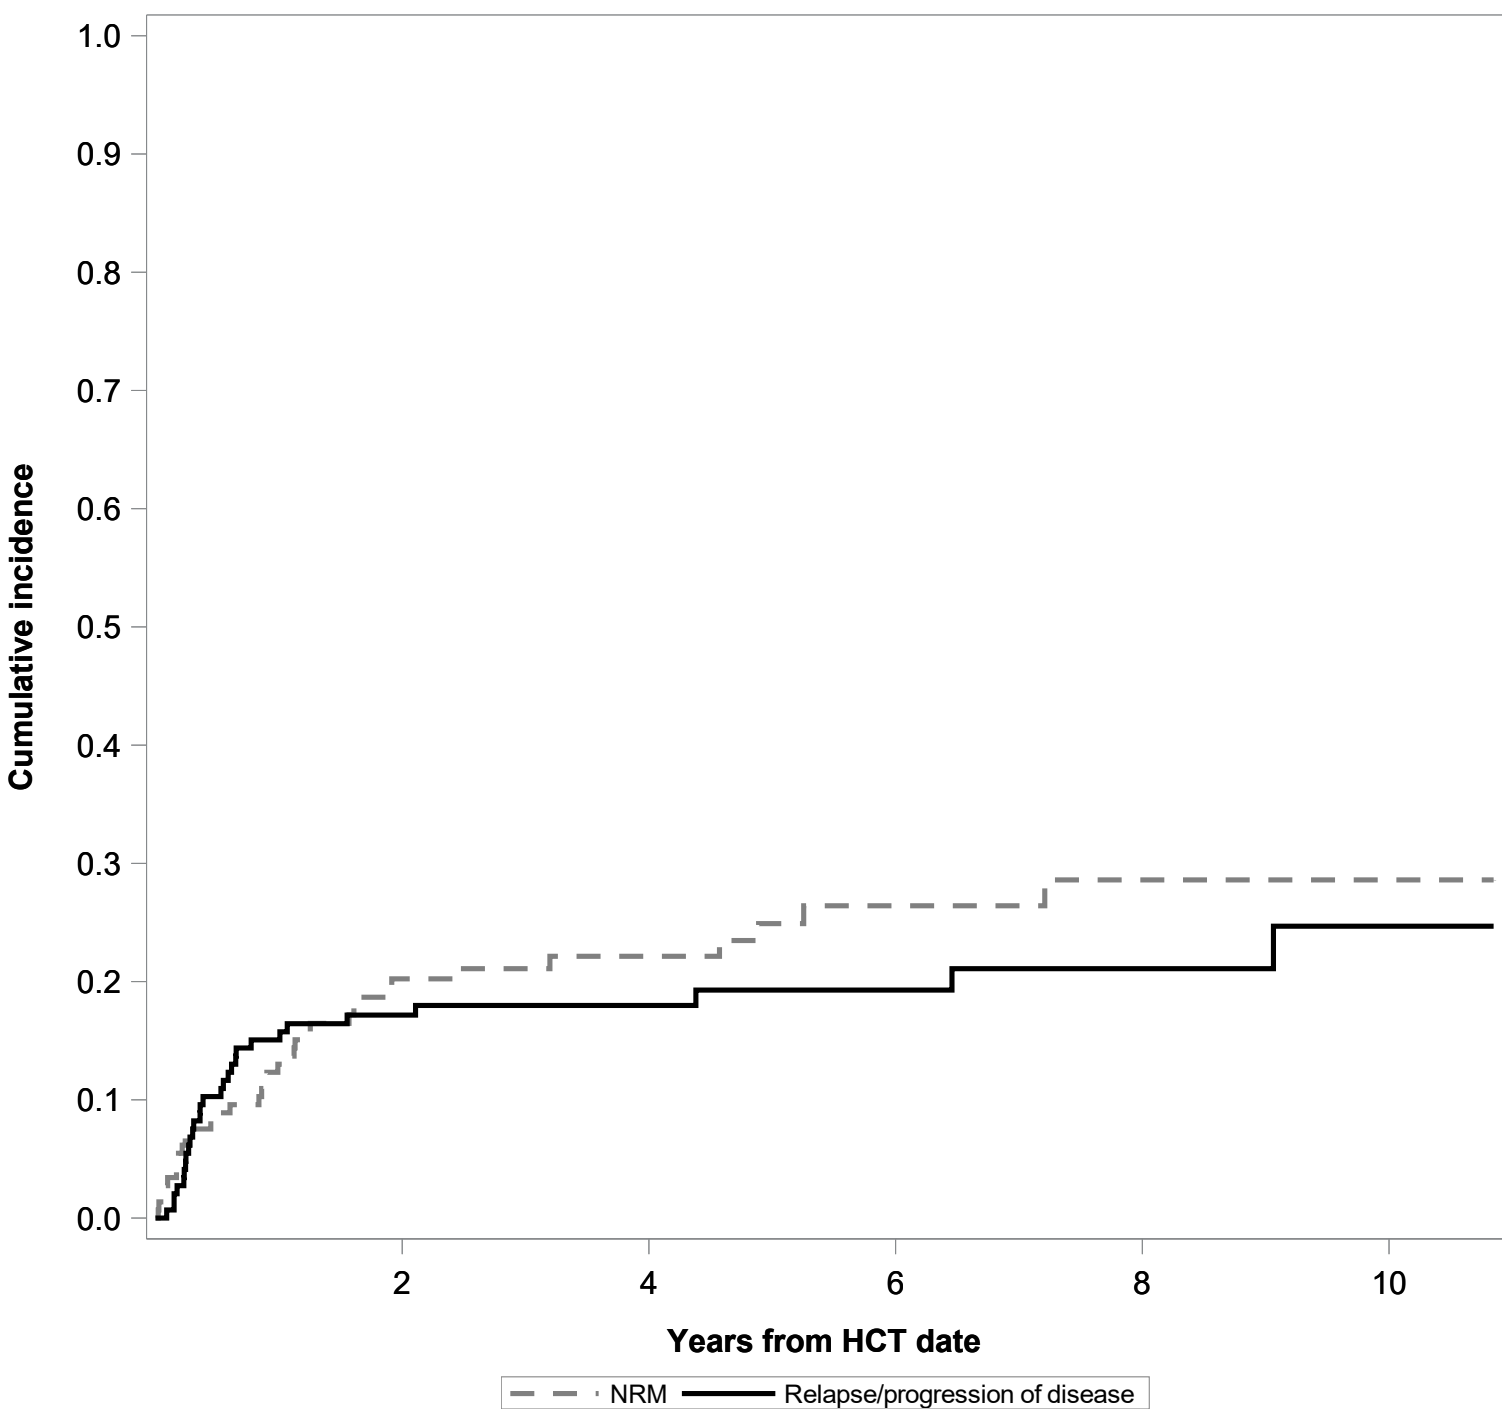

Supplement: NIHMS1613067-supplement-Supplemental_figure.pdf [file NIHMS1613067-supplement-Supplemental_figure.pdf]
